# Supplementary material for: Characterisation of Calcium Phosphate Crystals on Calcified Human Aortic Vascular Smooth Muscle Cells and Potential Role of Magnesium
Source: PubMed Central journal article supplement (PMC4301909; doi:10.1371/journal.pone.0115342), 2015-01-21

# I

a.

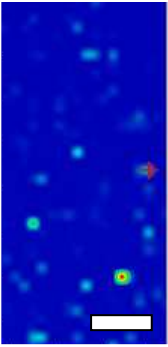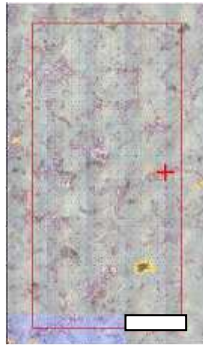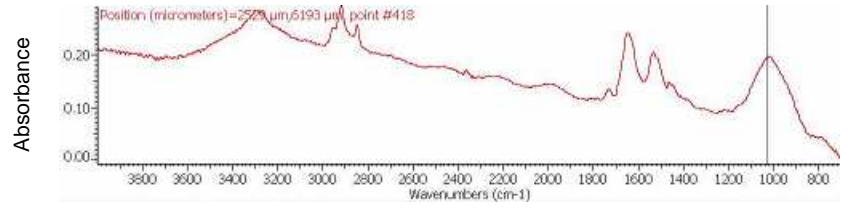

b.

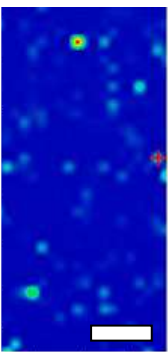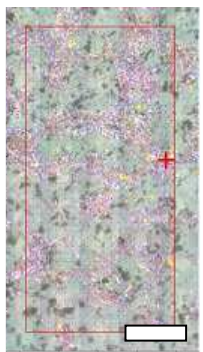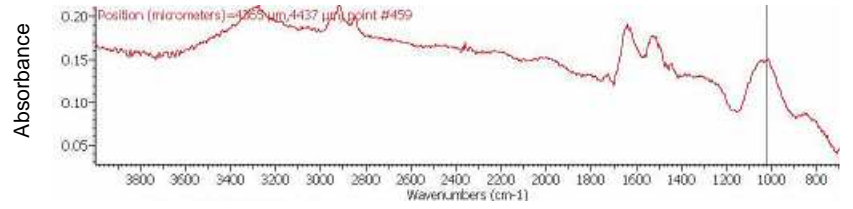

c.

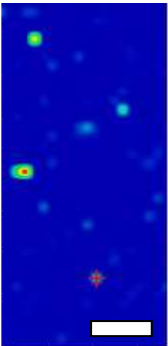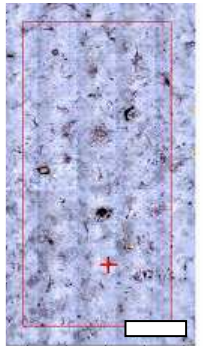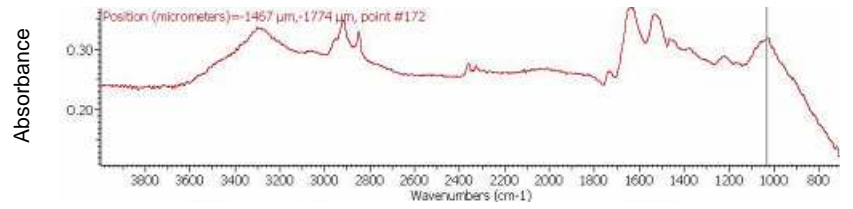

d.

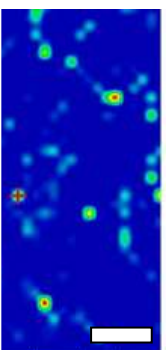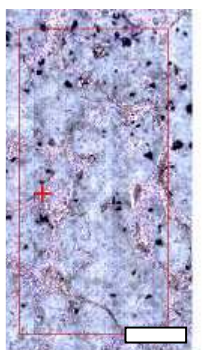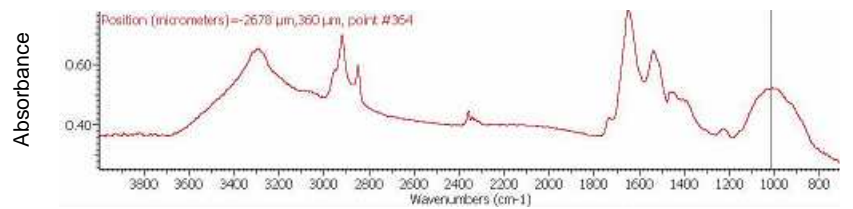

## II

### A

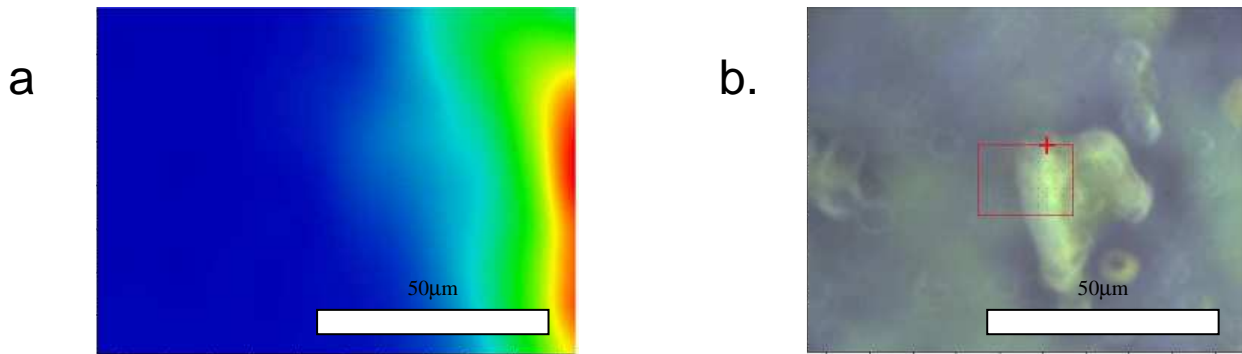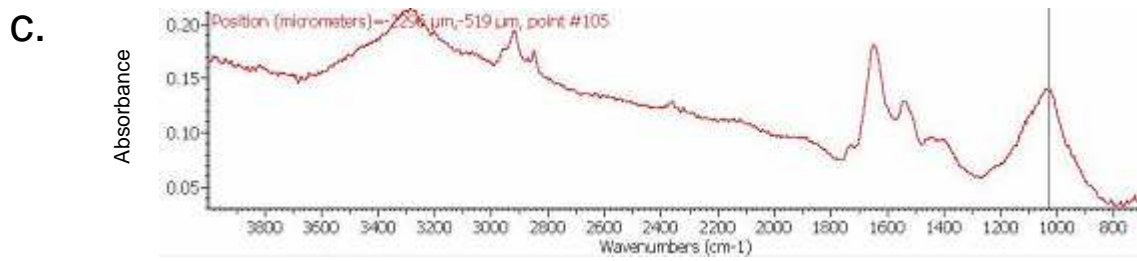

### B

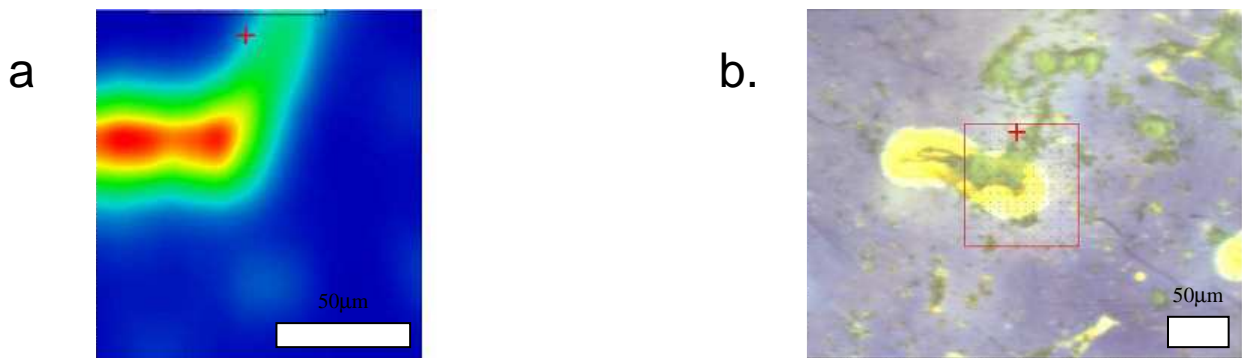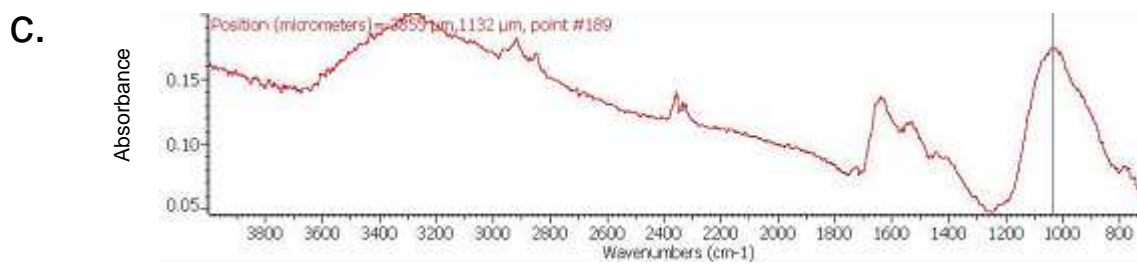

Supplement: pone.0115342.s001.pdf [file pone.0115342.s001.pdf]
