# Supplementary material for: Characterisation of Calcium Phosphate Crystals on Calcified Human Aortic Vascular Smooth Muscle Cells and Potential Role of Magnesium
Source: PubMed Central journal article supplement (PMC4301909; doi:10.1371/journal.pone.0115342), 2015-01-21
Supplement: pone.0115342.s002.pdf [file pone.0115342.s002.pdf]

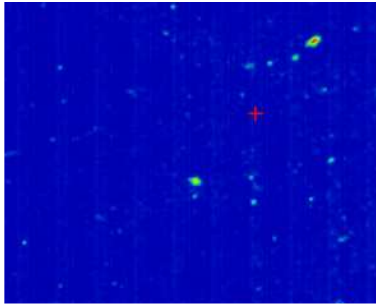

**Pi4**

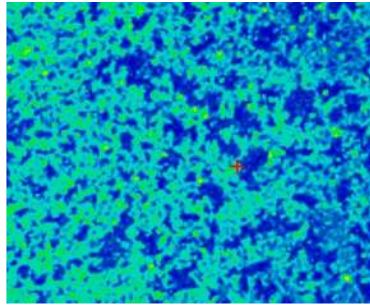

**Pi4 Mg2**

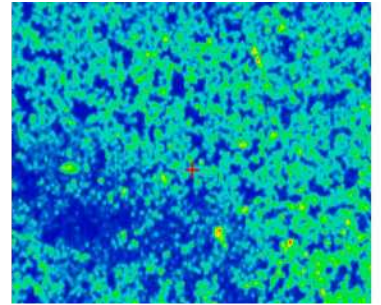

**Pi4 Mg5**

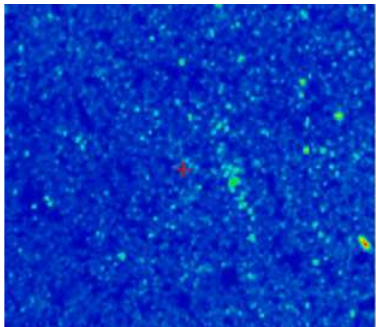

**PiCa**

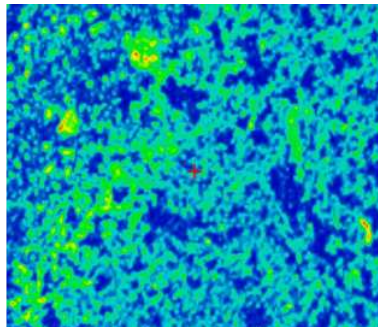

**PiCa Mg2**

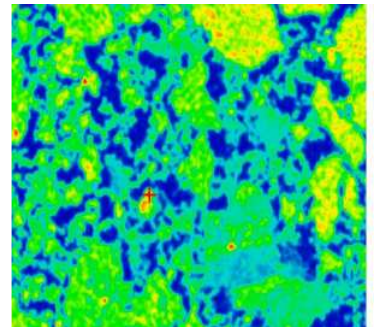

**PiCa Mg5**
